# Supplementary material for: Comparative analysis of virus-host interactions caused by a virulent and an attenuated duck hepatitis A virus genotype 1
Source: PubMed Central journal article supplement (PMC5470708; doi:10.1371/journal.pone.0178993), 2017-06-14
Supplement: pone.0178993.s001.pdf [file pone.0178993.s001.pdf]

**S1 Table. Representative viral strains in this analysis, with comments.**

| Groups                            | Strains    | Accession no. | Comments           |
|-----------------------------------|------------|---------------|--------------------|
| Chicken embryo attenuated strains | CH60       | KU923754.1    | 60 passages(china) |
|                                   | C80        | DQ864514      | 80 passages(china) |
|                                   | FC64       | HQ232302      | 64 passages(china) |
|                                   | A66        | DQ886445      | 66 passages(china) |
|                                   | MY         | JF914945      | 86 passages(china) |
| Virulent strains                  | LSD/090830 | JF828989      | China              |
|                                   | FZ99       | JX390984      | China              |
|                                   | NA         | GQ130377      | China              |
|                                   | C-XNH      | GU066820      | China              |
|                                   | ZJ         | EU841005      | China              |
|                                   | DRL-62     | DQ219396      | ATCC               |
|                                   | R85952     | DQ226541      | ATCC               |
|                                   | 03D        | DQ249299      | Taiwan China       |
|                                   | JX         | EU371557      | China              |
|                                   | F          | EU264072      | China              |
| H                                 | JQ301467   | China         |                    |
