# Supplementary material for: Comparative analysis of virus-host interactions caused by a virulent and an attenuated duck hepatitis A virus genotype 1
Source: PubMed Central journal article supplement (PMC5470708; doi:10.1371/journal.pone.0178993), 2017-06-14
Supplement: pone.0178993.s002.pdf [file pone.0178993.s002.pdf]

**S2 Table. Primer sequences used in gene expression profiles.**

| Gene              | Forward primer                 | Reverse primer                    | Accession number | Reference |
|-------------------|--------------------------------|-----------------------------------|------------------|-----------|
| GAPDH             | 5'-ATGTTTCGTGATGGGTGTGAA-3'    | 5'-CTGTCTTCGTGTGTGGCTGT-3'        | AY436595         | [38]      |
| IFN- $\alpha$     | 5'-TCCTCCAACACCTCTTCGAC-3'     | 5'-GGGCTGTAGGTGTGGTTCTG-3'        | EF053034         | [38]      |
| IFN- $\beta$      | 5'-CCTCAACCAGATCCAGCATT-3'     | 5'-GGATGAGGCTGTGAGAGGAG-3'        | AY831397         | [38]      |
| IFN- $\gamma$     | 5'-GCTGATGGCAATCCTGTTTT-3'     | 5'-GGATTTTCAAGCCAGTCAGC-3'        | AJ012254         | [38]      |
| IL-1 $\beta$      | 5'-TCGACATCAACCAGAAGTGC-3'     | 5'-GAGCTTGTAGCCCTTGATGC-3'        | DQ393268         | [38]      |
| IL-2              | 5'-GCCAAGAGCTGACCAACTTC-3'     | 5'-ATCGCCACACTAAGAGCAT-3'         | AF294323         | [38]      |
| IL-4              | 5'-CCTCCACGGTTGTTTTCGAG-3'     | 5'-GTTGGAGGGTCTGTGGAGG-3'         | XM_005024359.1   | [39]      |
| IL-6              | 5'-TTCGACGAGGAGAAATGCTT-3'     | 5'-CCTTATCGTCGTTGCCAGAT-3'        | AB191038         | [38]      |
| MHC-I             | 5'-GAAGGAAGAGACTTCATTGCCTTG-3' | 5'-CTCTCCTCTCCAGTACGTCCTTCC-3'    | AB115246         | [38]      |
| MHC-II            | 5'-CCACCTTTACCAGCTTCGAG-3'     | 5'-CCGTTCTTCATCCAGGTGAT-3'        | AY905539         | [38]      |
| BAFF              | 5'-TGTGCACGTCATCCAACAGA-3'     | 5'-GCCACAGGAATGTGACAGGA-3'        | DQ445092         | [39]      |
| CCL21             | 5'-GGAGAAGCAGAAGAACCCCC-3'     | 5'-GGGAAAGCATCCGTCCTCTC-3'        | DR764376         | [39]      |
| CCL19             | 5'-CCAGGAAGTCCCAAATAAA-3'      | 5'-GTAGTAGGAGGTGGAAGCAAGTC-3'     | DR766004         | [39]      |
| $\beta$ -defensin | 5'-CCAGTTTCTCCAGGATTGT-3'      | 5'-AACCCAAAGCAACTTCCAAC-3'        | AY641439         | [39]      |
| TLR7              | 5'-CCTTTCCAGAGAGCATTCA-3'      | 5'-TCAAGAAATATCAAGATAATCACATCA-3' | AY940195         | [38]      |
| TLR3              | 5'-AACACTCCGCCTAAGTATCAT-3'    | 5'-CTATCCTCCACCCTTCAAAA-3'        | JN573268         | [39]      |
| RIG-1             | 5'-GCGTACCGCTATAACCCACA-3'     | 5'-CCTTGCTGGTTTTGAACGC-3'         | AB772012.1       | [39]      |
| MDA5              | 5'-GCTGAAGAAGGCCTGGACAT-3'     | 5'-TCCTCTGGACACGCTGAATG-3'        | KJ451070.1       | [39]      |
