# Supplementary material for: Comparative analysis of virus-host interactions caused by a virulent and an attenuated duck hepatitis A virus genotype 1
Source: PubMed Central journal article supplement (PMC5470708; doi:10.1371/journal.pone.0178993), 2017-06-14
Supplement: pone.0178993.s003.pdf [file pone.0178993.s003.pdf]

**S3 Table. RSCU of Virulent strains and attenuated strains used in this study.**

| Strains    | Leu<br>UUA | Leu<br>CUA | Val<br>GUA | Ser<br>UCA | Thr<br>ACA | Pro<br>CCA | Ala<br>GCA | Lys<br>AAA | Gln<br>CAA | Gly<br>GGA | Arg<br>AGA | Arg<br>CGA | Glu<br>GAA | IleA<br>UA | Ser<br>AGU | Asp<br>GAU | Arg<br>CGU |
|------------|------------|------------|------------|------------|------------|------------|------------|------------|------------|------------|------------|------------|------------|------------|------------|------------|------------|
| A66        | 0.67       | 0.64       | 0.57       | 1.85       | 1.67       | 2          | 1.42       | 1.16       | 1.09       | 1.07       | 1.87       | 0.68       | 1.17       | 0.62       | 0.94       | 1.27       | 0.45       |
| C80        | 0.64       | 0.67       | 0.57       | 1.88       | 1.66       | 1.98       | 1.42       | 1.16       | 1.1        | 1.07       | 1.87       | 0.68       | 1.16       | 0.62       | 0.96       | 1.31       | 0.45       |
| CH60       | 0.67       | 0.64       | 0.57       | 1.86       | 1.66       | 1.98       | 1.42       | 1.16       | 1.1        | 1.08       | 1.87       | 0.68       | 1.16       | 0.62       | 1.03       | 1.31       | 0.45       |
| FC64       | 0.67       | 0.64       | 0.58       | 1.91       | 1.65       | 1.98       | 1.42       | 1.17       | 1.1        | 1.12       | 1.85       | 0.67       | 1.15       | 0.64       | 0.99       | 1.32       | 0.45       |
| MY         | 0.67       | 0.64       | 0.57       | 1.85       | 1.66       | 1.98       | 1.42       | 1.17       | 1.1        | 1.08       | 1.92       | 0.68       | 1.16       | 0.62       | 1.06       | 1.3        | 0.45       |
| 3D         | 0.67       | 0.55       | 0.56       | 1.82       | 1.71       | 2.02       | 1.42       | 1.12       | 1.1        | 1.04       | 1.98       | 0.72       | 1.22       | 0.62       | 1.08       | 1.33       | 0.55       |
| LSD/090830 | 0.75       | 0.51       | 0.5        | 1.78       | 1.64       | 1.96       | 1.4        | 1.11       | 1.04       | 1.09       | 1.96       | 0.71       | 1.2        | 0.64       | 1.12       | 1.27       | 0.44       |
| C-XNH      | 0.58       | 0.77       | 0.46       | 1.78       | 1.64       | 1.91       | 1.45       | 1.1        | 1.07       | 1.03       | 1.98       | 0.61       | 1.19       | 0.64       | 1.18       | 1.34       | 0.5        |
| FZ99       | 0.61       | 0.67       | 0.54       | 1.82       | 1.58       | 1.93       | 1.47       | 1.07       | 1.09       | 0.97       | 1.93       | 0.66       | 1.24       | 0.6        | 1.12       | 1.34       | 0.5        |
| ZJ         | 0.58       | 0.64       | 0.57       | 1.92       | 1.65       | 1.96       | 1.38       | 1.1        | 1.04       | 0.95       | 1.96       | 0.65       | 1.25       | 0.6        | 1.08       | 1.33       | 0.49       |
| NA         | 0.65       | 0.65       | 0.55       | 1.92       | 1.66       | 1.96       | 1.44       | 1.1        | 1.04       | 0.95       | 1.93       | 0.66       | 1.23       | 0.59       | 1.04       | 1.37       | 0.5        |
| Strains    | Gly<br>GGU | Cys<br>UGU | Asn<br>AAU | Tyr<br>UAU | His<br>CAU | Ala<br>GCU | Phe<br>UUU | Leu<br>CUU | Val<br>GUU | Pro<br>CCU | Thr<br>ACU | IleA<br>UU | Ser<br>UCU | Gln<br>CAG | Ala<br>GCG | Arg<br>CGG | Gly<br>GGG |
| A66        | 1.01       | 1.33       | 1.37       | 1.47       | 1.18       | 1.51       | 1.35       | 1.38       | 1.35       | 1.26       | 1.5        | 1.69       | 1.89       | 0.91       | 0.09       | 0.68       | 0.91       |
| C80        | 1.02       | 1.33       | 1.37       | 1.44       | 1.22       | 1.51       | 1.38       | 1.41       | 1.35       | 1.27       | 1.52       | 1.69       | 1.85       | 0.9        | 0.09       | 0.68       | 0.91       |
| CH60       | 1          | 1.33       | 1.35       | 1.5        | 1.22       | 1.51       | 1.38       | 1.41       | 1.35       | 1.27       | 1.52       | 1.69       | 1.82       | 0.9        | 0.09       | 0.68       | 0.92       |
| FC64       | 1.01       | 1.36       | 1.36       | 1.45       | 1.25       | 1.51       | 1.4        | 1.41       | 1.32       | 1.27       | 1.5        | 1.68       | 1.8        | 0.9        | 0.09       | 0.67       | 0.88       |
| MY         | 1          | 1.33       | 1.35       | 1.53       | 1.22       | 1.48       | 1.4        | 1.41       | 1.35       | 1.27       | 1.52       | 1.71       | 1.81       | 0.9        | 0.12       | 0.68       | 0.92       |
| 3D         | 1.01       | 1.55       | 1.38       | 1.44       | 1.16       | 1.39       | 1.43       | 1.35       | 1.39       | 1.17       | 1.61       | 1.73       | 1.82       | 0.9        | 0.09       | 0.61       | 0.93       |
| LSD/090830 | 1.09       | 1.48       | 1.35       | 1.46       | 1.35       | 1.49       | 1.41       | 1.44       | 1.41       | 1.26       | 1.56       | 1.88       | 1.74       | 0.96       | 0.18       | 0.6        | 0.85       |
| C-XNH      | 1.05       | 1.43       | 1.4        | 1.53       | 1.18       | 1.39       | 1.35       | 1.35       | 1.46       | 1.17       | 1.52       | 1.75       | 1.71       | 0.93       | 0.09       | 0.66       | 0.95       |
| FZ99       | 1.03       | 1.43       | 1.35       | 1.5        | 1.22       | 1.47       | 1.35       | 1.32       | 1.41       | 1.15       | 1.6        | 1.83       | 1.78       | 0.91       | 0.09       | 0.66       | 0.97       |
| ZJ         | 0.95       | 1.55       | 1.39       | 1.5        | 1.18       | 1.47       | 1.4        | 1.49       | 1.39       | 1.26       | 1.6        | 1.83       | 1.85       | 0.96       | 0.15       | 0.65       | 1          |
| NA         | 0.97       | 1.55       | 1.33       | 1.55       | 1.16       | 1.47       | 1.38       | 1.48       | 1.42       | 1.26       | 1.59       | 1.83       | 1.85       | 0.96       | 0.12       | 0.61       | 0.97       |

| Strains    | Glu<br>GAG | Lys<br>AAG | Thr<br>ACG | Leu<br>UUG | Ser<br>UCG | Pro<br>CCG | Val<br>GUG | Leu<br>CUG | Ala<br>GCC | Asp<br>GAC | Cys<br>UGC | Arg<br>CGC | Ser<br>AGC | Arg<br>AGG | Gly<br>GGC | Tyr<br>UAC | His<br>CAC |
|------------|------------|------------|------------|------------|------------|------------|------------|------------|------------|------------|------------|------------|------------|------------|------------|------------|------------|
| A66        | 0.83       | 0.84       | 0.08       | 1.65       | 0.08       | 0.07       | 1.27       | 0.7        | 0.98       | 0.73       | 0.67       | 0.96       | 0.53       | 1.36       | 1.01       | 0.53       | 0.82       |
| C80        | 0.84       | 0.84       | 0.07       | 1.62       | 0.08       | 0.07       | 1.27       | 0.73       | 0.98       | 0.69       | 0.67       | 0.96       | 0.54       | 1.36       | 0.99       | 0.56       | 0.78       |
| CH60       | 0.84       | 0.84       | 0.07       | 1.65       | 0.08       | 0.07       | 1.27       | 0.7        | 0.98       | 0.69       | 0.67       | 0.96       | 0.53       | 1.36       | 1          | 0.5        | 0.78       |
| FC64       | 0.85       | 0.83       | 0.08       | 1.65       | 0.08       | 0.07       | 1.29       | 0.7        | 0.98       | 0.68       | 0.64       | 1.01       | 0.54       | 1.35       | 0.99       | 0.55       | 0.75       |
| MY         | 0.84       | 0.83       | 0.07       | 1.65       | 0.08       | 0.07       | 1.25       | 0.7        | 0.98       | 0.7        | 0.67       | 0.96       | 0.53       | 1.3        | 1          | 0.47       | 0.78       |
| 3D         | 0.78       | 0.88       | 0.08       | 1.68       | 0.12       | 0.07       | 1.27       | 0.77       | 1.1        | 0.67       | 0.45       | 0.94       | 0.39       | 1.21       | 1.01       | 0.56       | 0.84       |
| LSD/090830 | 0.8        | 0.89       | 0.13       | 1.71       | 0.19       | 0.07       | 1.31       | 0.69       | 0.93       | 0.73       | 0.52       | 1.04       | 0.35       | 1.25       | 0.96       | 0.54       | 0.65       |
| C-XNH      | 0.81       | 0.9        | 0.1        | 1.82       | 0.15       | 0.15       | 1.36       | 0.58       | 1.06       | 0.66       | 0.57       | 0.99       | 0.3        | 1.27       | 0.97       | 0.47       | 0.82       |
| FZ99       | 0.76       | 0.93       | 0.1        | 1.78       | 0.15       | 0.15       | 1.33       | 0.67       | 0.96       | 0.66       | 0.57       | 0.99       | 0.35       | 1.27       | 1.03       | 0.5        | 0.78       |
| ZJ         | 0.75       | 0.9        | 0.07       | 1.68       | 0.15       | 0.07       | 1.32       | 0.76       | 0.99       | 0.67       | 0.45       | 0.98       | 0.35       | 1.25       | 1.11       | 0.5        | 0.82       |
| NA         | 0.77       | 0.9        | 0.07       | 1.69       | 0.12       | 0.07       | 1.34       | 0.71       | 0.97       | 0.63       | 0.45       | 0.99       | 0.38       | 1.32       | 1.11       | 0.45       | 0.84       |
| Strains    | Asn<br>AAC | Phe<br>UUC | Leu<br>CUC | Ile<br>AUC | Val<br>GUC | Ser<br>UCC | Pro<br>CCC | Thr<br>ACC |            |            |            |            |            |            |            |            |            |
| A66        | 0.63       | 0.65       | 0.95       | 0.69       | 0.81       | 0.72       | 0.67       | 0.75       |            |            |            |            |            |            |            |            |            |
| C80        | 0.63       | 0.62       | 0.92       | 0.69       | 0.81       | 0.69       | 0.67       | 0.75       |            |            |            |            |            |            |            |            |            |
| CH60       | 0.65       | 0.62       | 0.92       | 0.69       | 0.81       | 0.68       | 0.67       | 0.75       |            |            |            |            |            |            |            |            |            |
| FC64       | 0.64       | 0.6        | 0.92       | 0.68       | 0.82       | 0.69       | 0.67       | 0.77       |            |            |            |            |            |            |            |            |            |
| MY         | 0.65       | 0.6        | 0.92       | 0.67       | 0.83       | 0.68       | 0.67       | 0.75       |            |            |            |            |            |            |            |            |            |
| 3D         | 0.62       | 0.57       | 0.98       | 0.65       | 0.78       | 0.77       | 0.73       | 0.6        |            |            |            |            |            |            |            |            |            |
| LSD/090830 | 0.65       | 0.59       | 0.9        | 0.48       | 0.78       | 0.81       | 0.7        | 0.68       |            |            |            |            |            |            |            |            |            |
| C-XNH      | 0.6        | 0.65       | 0.89       | 0.61       | 0.72       | 0.87       | 0.77       | 0.75       |            |            |            |            |            |            |            |            |            |
| FZ99       | 0.65       | 0.65       | 0.95       | 0.57       | 0.72       | 0.77       | 0.78       | 0.72       |            |            |            |            |            |            |            |            |            |
| ZJ         | 0.61       | 0.6        | 0.85       | 0.57       | 0.72       | 0.65       | 0.7        | 0.67       |            |            |            |            |            |            |            |            |            |
| NA         | 0.67       | 0.62       | 0.83       | 0.59       | 0.68       | 0.69       | 0.7        | 0.67       |            |            |            |            |            |            |            |            |            |
