# Supplementary material for: Comparative analysis of virus-host interactions caused by a virulent and an attenuated duck hepatitis A virus genotype 1
Source: PubMed Central journal article supplement (PMC5470708; doi:10.1371/journal.pone.0178993), 2017-06-14
Supplement: pone.0178993.s004.pdf [file pone.0178993.s004.pdf]

**S4 Table. The original expression levels of immune-related genes as calculated by  $\Delta Ct (Ct_{target}-Ct_{GAPDH})$ .**

| Control   | IFN- $\alpha$ | IFN- $\beta$ | IFN- $\gamma$ | IL-1 $\beta$ | IL-2  | IL-4  | IL-6  | MHC-I | MHC-II | BAFF  | CCL-19 | CCL-21 | TLR-7 | TLR-3 | $\beta$ -defensin | RIG-1 | MDA5 |
|-----------|---------------|--------------|---------------|--------------|-------|-------|-------|-------|--------|-------|--------|--------|-------|-------|-------------------|-------|------|
| Blood     | 7.08          | 17.57        | 16.82         | 8.68         | 16.03 | 12.30 | 16.06 | -2.55 | 4.48   | 9.36  | 14.65  | 7.58   | 12.40 | 4.12  | 7.60              | 3.80  | 2.07 |
| Blood     | 5.79          | 22.54        | 15.28         | 9.12         | 16.95 | 11.20 | 15.30 | -2.42 | 4.51   | 9.87  | 13.79  | 7.25   | 13.48 | 5.17  | 7.02              | 4.37  | 1.65 |
| Blood     | 6.05          | 18.99        | 17.39         | 7.45         | 16.99 | 12.10 | 15.16 | -2.67 | 3.73   | 9.42  | 13.15  | 8.39   | 12.84 | 4.80  | 7.89              | 4.12  | 1.46 |
| Blood     | 5.30          | 18.34        | 17.16         | 8.53         | 17.12 | 13.83 | 15.63 | -2.68 | 4.09   | 9.42  | 13.49  | 7.38   | 13.31 | 4.56  | 8.30              | 4.33  | 1.84 |
| Blood     | 7.33          | 20.55        | 17.01         | 8.64         | 17.56 | 12.33 | 15.41 | -1.30 | 4.70   | 9.34  | 14.11  | 7.98   | 12.71 | 4.43  | 7.53              | 4.62  | 2.41 |
| Fabricius | 12.11         | 22.71        | 9.49          | none         | 19.18 | 13.50 | 14.90 | 0.25  | 1.05   | 7.61  | 6.59   | 4.77   | 10.43 | 7.78  | 12.61             | 5.38  | 4.75 |
| Fabricius | 11.90         | 22.60        | none          | 11.88        | 20.34 | 15.16 | 13.31 | 0.42  | 0.46   | 8.35  | 6.35   | 3.97   | 9.90  | 7.06  | 12.07             | 5.19  | 3.96 |
| Fabricius | 12.12         | none         | 8.74          | 12.68        | 21.61 | 15.00 | 15.55 | 0.19  | 0.22   | 8.19  | 5.55   | 4.30   | 10.48 | 7.12  | 14.31             | 5.24  | 3.02 |
| Fabricius | 11.98         | 21.50        | 6.13          | 12.10        | 21.24 | 15.74 | 14.37 | 0.52  | 1.22   | 7.55  | 5.62   | 3.15   | 9.41  | 7.85  | 14.58             | 5.74  | 3.65 |
| Fabricius | 11.98         | none         | 7.93          | 12.11        | none  | 13.42 | 14.25 | 0.45  | 1.03   | 8.42  | none   | 4.50   | 10.41 | 7.06  | 11.87             | 6.03  | 4.23 |
| Hardrain  | 11.35         | none         | 15.00         | 16.19        | 16.02 | 11.04 | 7.12  | 1.55  | 5.58   | 11.41 | 9.49   | 4.67   | 12.84 | 3.95  | 10.62             | 6.55  | 6.26 |
| Hardrain  | 12.39         | 22.72        | 16.42         | 15.82        | 14.23 | 11.05 | 7.60  | 1.88  | 6.53   | 11.36 | 8.87   | 4.58   | 13.15 | 4.22  | 12.24             | 6.76  | 7.78 |
| Hardrain  | 13.33         | 21.51        | 16.32         | 16.58        | 14.85 | 10.56 | 7.34  | 1.96  | 6.20   | 11.41 | 9.45   | 5.13   | 12.36 | 4.19  | 12.73             | 5.06  | 7.67 |
| Hardrain  | 11.68         | 24.48        | 16.22         | 16.82        | 16.80 | 11.02 | 7.34  | 2.39  | 5.40   | 12.43 | 9.75   | 3.62   | 12.64 | 3.85  | 13.34             | 6.79  | 6.66 |
| Hardrain  | 12.98         | 15.88        | 16.09         | 14.72        | 16.89 | 10.81 | 7.44  | 2.96  | 5.20   | 11.91 | 8.24   | 4.70   | 12.57 | 4.27  | 13.47             | 5.81  | 8.13 |
| Kidney    | 14.93         | 24.56        | 15.89         | 17.00        | 23.86 | 17.00 | 20.49 | 2.97  | 7.73   | 15.33 | 11.35  | 7.32   | 16.97 | 5.59  | 14.74             | 9.31  | 6.90 |
| Kidney    | 15.39         | 27.32        | 16.77         | 17.10        | 22.69 | 17.01 | 21.13 | 3.74  | 5.86   | 14.52 | 10.00  | 6.85   | 16.98 | 5.27  | 16.09             | 8.95  | 8.17 |
| Kidney    | 14.92         | 25.22        | 16.57         | 17.11        | 21.45 | 16.39 | 20.41 | 3.97  | 6.17   | 15.57 | 11.83  | 6.92   | 16.71 | 5.06  | 14.51             | 9.59  | 8.66 |
| Kidney    | 15.80         | 22.56        | 18.00         | 17.69        | 23.37 | 16.88 | 20.78 | 2.67  | 7.07   | 16.53 | 11.52  | 6.31   | 16.69 | 5.77  | 15.28             | 9.87  | 8.62 |
| Kidney    | 14.91         | 20.76        | 18.71         | 17.76        | 23.27 | 15.57 | 20.71 | 2.23  | 7.24   | 16.66 | 11.37  | 7.40   | 16.70 | 5.70  | 13.44             | 9.53  | 7.50 |
| Liver     | 13.45         | 23.87        | 14.49         | 13.00        | 20.80 | 14.20 | 18.98 | 0.56  | 3.03   | 11.76 | 7.76   | 4.01   | 14.60 | 5.27  | 9.82              | 5.36  | 7.82 |
| Liver     | 13.53         | 22.29        | 15.29         | 14.44        | 20.52 | 15.77 | 18.43 | 0.83  | 2.66   | 12.81 | 6.57   | 4.40   | 14.37 | 5.28  | 10.88             | 6.25  | 6.52 |
| Liver     | 13.98         | 24.57        | 15.87         | 14.76        | 21.09 | 14.67 | 19.36 | 0.51  | 2.83   | 11.95 | 6.71   | 4.80   | 14.57 | 3.97  | 10.19             | 6.74  | 6.65 |
| Liver     | 14.74         | 23.02        | 17.87         | 15.58        | 20.23 | 15.15 | 19.13 | 0.72  | 3.28   | 12.57 | 5.11   | 4.75   | 14.22 | 4.82  | 8.24              | 5.36  | 6.93 |
| Liver     | 14.38         | 21.55        | 16.78         | 13.12        | 21.06 | 15.19 | 19.47 | 0.23  | 3.92   | 12.46 | 5.76   | 4.45   | 15.12 | 4.62  | 8.77              | 5.86  | 5.33 |
| Lung      | 10.54         | 21.13        | 15.75         | 8.32         | 17.71 | 11.40 | 13.40 | -1.66 | 1.84   | 10.36 | 6.72   | 1.32   | 11.07 | 4.66  | 5.42              | 4.50  | 4.37 |
| Lung      | 10.67         | 23.75        | 16.60         | 8.72         | 17.89 | 11.12 | 13.19 | -1.08 | 1.09   | 9.82  | 6.17   | 0.53   | 11.29 | 3.90  | 5.72              | 4.64  | 5.54 |
| Lung      | 8.44          | 19.76        | 15.48         | 6.84         | 17.66 | 11.44 | 13.42 | -1.89 | 1.14   | 10.11 | 6.86   | 0.52   | 11.17 | 2.56  | 6.22              | 4.29  | 6.94 |
| Lung      | 8.63          | 23.70        | 17.90         | 8.41         | 17.95 | 11.60 | 13.22 | -2.07 | 1.12   | 10.09 | 5.35   | 1.15   | 11.38 | 4.89  | 5.31              | 4.76  | 4.14 |
| Lung      | 10.16         | 21.78        | 17.40         | 7.88         | 17.51 | 10.78 | 13.85 | -2.28 | 1.96   | 10.17 | 5.80   | 1.13   | 12.65 | 3.26  | 5.43              | 5.68  | 4.30 |
| Spleen    | 12.17         | 18.07        | 6.21          | 12.77        | 19.29 | 15.23 | 12.66 | -0.67 | 0.18   | 7.24  | 2.32   | 0.95   | 10.27 | 5.43  | 6.25              | 4.87  | 3.79 |
| Spleen    | 11.66         | 22.09        | 8.40          | 12.77        | 21.49 | 14.71 | 13.20 | -1.09 | 0.05   | 7.85  | 2.00   | 0.93   | 10.34 | 4.49  | 4.53              | 4.25  | 3.34 |
| Spleen    | 11.01         | 21.79        | 6.23          | 13.69        | 19.80 | 14.25 | 12.49 | -0.84 | 0.01   | 7.40  | 2.49   | 0.61   | 10.29 | 4.23  | 5.78              | 3.71  | 3.13 |
| Spleen    | 10.85         | 21.62        | 7.55          | 12.97        | 21.72 | 15.09 | 14.05 | -0.53 | 0.63   | 8.62  | 2.80   | 0.33   | 11.20 | 3.82  | 4.69              | 3.87  | 2.91 |
| Spleen    | 11.52         | 21.67        | 8.74          | 13.83        | 20.61 | 14.05 | 13.99 | -0.26 | 0.55   | 8.26  | 1.79   | 0.30   | 10.37 | 5.42  | 3.15              | 4.33  | 4.19 |
| Tymus     | 11.54         | 25.92        | 14.85         | 11.81        | 18.28 | 13.80 | 17.32 | none  | 2.52   | 9.26  | 6.44   | 2.50   | 12.89 | 4.33  | 3.18              | 7.13  | 4.68 |
| Tymus     | 11.60         | 23.45        | 15.47         | 11.75        | 19.05 | 13.58 | 17.92 | 1.98  | 2.11   | 10.00 | 6.51   | 3.53   | 13.62 | 5.02  | 3.61              | 7.93  | 5.75 |
| Tymus     | 11.81         | 21.66        | 15.10         | 13.02        | 19.91 | 12.47 | 19.30 | 2.20  | 1.46   | 10.71 | 7.29   | 3.51   | 13.70 | 4.52  | 5.34              | 9.14  | 6.19 |
| Tymus     | 11.54         | 26.22        | 12.52         | 11.74        | 19.58 | 13.80 | 19.18 | 1.80  | 1.84   | 10.96 | 7.94   | 4.22   | 13.68 | 4.67  | 4.98              | 8.20  | 5.07 |
| Tymus     | 11.15         | 24.05        | 16.67         | 12.57        | 19.49 | 14.18 | 16.90 | 2.07  | 2.32   | 10.04 | 6.93   | 3.07   | 13.26 | 5.74  | 4.19              | 7.84  | 5.34 |

| CH60      | IFN- $\alpha$ | IFN- $\beta$ | IFN- $\gamma$ | IL-1 $\beta$ | IL-2  | IL-4  | IL-6  | MHC-I | MHC-II | BAFF  | CCL-19 | CCL-21 | TLR-7 | TLR-3 | $\beta$ -defensin | RIG-1 | MDA5  |
|-----------|---------------|--------------|---------------|--------------|-------|-------|-------|-------|--------|-------|--------|--------|-------|-------|-------------------|-------|-------|
| Blood     | 6.47          | 18.53        | 17.91         | 14.11        | 15.48 | 8.80  | 17.04 | -1.55 | 3.88   | 9.93  | 15.93  | 9.49   | 10.92 | 8.47  | 7.04              | 7.97  | 4.05  |
| Blood     | 6.32          | 15.19        | 18.62         | 16.41        | 13.25 | 7.79  | 15.94 | -2.19 | 2.85   | 9.24  | 16.07  | 10.48  | 11.12 | 7.47  | 7.76              | 8.50  | 18.39 |
| Blood     | 6.77          | 14.73        | 24.66         | 15.74        | 13.16 | 6.67  | 16.54 | -1.42 | 2.92   | 9.12  | 14.12  | 9.91   | 11.56 | 6.47  | 6.53              | 7.71  | 4.58  |
| Blood     | 5.97          | 18.33        | 20.14         | 17.27        | 16.59 | 8.99  | 16.86 | -1.02 | 3.76   | 9.94  | 15.65  | 12.62  | 12.24 | 8.17  | 7.36              | 8.48  | 4.32  |
| Blood     | 5.17          | 15.44        | 18.01         | 16.86        | 14.03 | 8.28  | 16.35 | -4.69 | 1.16   | 9.01  | 14.52  | 9.65   | 10.96 | 6.45  | 6.71              | 7.37  | 2.68  |
| Fabricius | 8.73          | 18.24        | 13.56         | 12.38        | 10.59 | 3.56  | 11.75 | 0.17  | 3.16   | 10.84 | 7.93   | -0.12  | 9.37  | 3.69  | 9.80              | 6.50  | 6.35  |
| Fabricius | 9.02          | 13.80        | 13.28         | 12.45        | 10.24 | 4.35  | 12.63 | 1.03  | 1.73   | 9.73  | 12.23  | 1.92   | 7.87  | 7.32  | 12.03             | 7.67  | 5.15  |
| Fabricius | 8.85          | 23.08        | 13.51         | 11.30        | 10.66 | 3.40  | 11.35 | 0.83  | 2.04   | 10.05 | 6.95   | -1.26  | 7.99  | 6.23  | 6.33              | 6.21  | 5.87  |
| Fabricius | 7.50          | 12.24        | 12.71         | 10.97        | 7.76  | 1.02  | 11.04 | 2.21  | 5.50   | 8.70  | 9.11   | -0.20  | 9.64  | 4.66  | 7.16              | 8.99  | 9.86  |
| Fabricius | 8.73          | 14.29        | 12.46         | 14.00        | 10.43 | 4.11  | 11.37 | -1.48 | 0.90   | 9.95  | 11.25  | 1.93   | 7.29  | 7.56  | 11.19             | 7.02  | 4.35  |
| Hardrain  | 11.27         | 21.67        | 10.09         | 9.41         | 8.79  | 0.14  | 5.97  | -0.31 | 6.89   | 9.31  | 7.02   | -0.64  | 9.08  | 2.88  | 7.30              | 4.13  | 5.88  |
| Hardrain  | 13.18         | 14.70        | 13.51         | 13.51        | 8.47  | 3.77  | 5.79  | 1.46  | 5.50   | 10.15 | 8.49   | 2.66   | 10.17 | 2.82  | 12.27             | 2.86  | 4.27  |
| Hardrain  | 13.34         | 22.57        | 15.68         | 20.34        | 14.61 | 6.79  | 7.06  | 1.87  | 4.30   | 11.27 | 9.52   | 3.66   | 12.19 | 4.62  | 10.48             | 5.14  | 6.86  |
| Hardrain  | 13.49         | 19.77        | 23.35         | 13.91        | 12.43 | 4.14  | 5.71  | -0.50 | 6.84   | 10.44 | 9.38   | 2.96   | 11.82 | 2.87  | 10.73             | 3.82  | 6.84  |
| Hardrain  | 12.37         | 16.75        | 13.31         | 11.81        | 10.60 | 3.65  | 6.19  | -0.35 | 5.84   | 10.61 | 9.36   | 3.77   | 11.64 | 3.21  | 10.29             | 5.20  | 7.25  |
| Kidney    | 8.31          | 20.22        | 15.45         | 16.01        | 13.46 | 6.05  | 14.65 | 2.70  | 6.31   | 13.49 | 11.47  | 3.09   | 13.96 | 6.13  | 9.19              | 9.45  | 7.37  |
| Kidney    | 9.03          | 14.60        | 14.66         | 12.27        | 10.51 | 5.22  | 13.86 | 2.20  | 5.75   | 13.57 | 11.93  | 2.11   | 16.64 | 4.87  | 7.28              | 9.57  | 7.28  |
| Kidney    | 9.34          | 18.95        | 14.13         | 14.78        | none  | 5.72  | 15.32 | 1.66  | 4.99   | 12.63 | 9.67   | 2.44   | 11.05 | 4.68  | -3.61             | 9.26  | 7.27  |
| Kidney    | 9.40          | 19.39        | 23.49         | 13.92        | 14.69 | 4.31  | 13.98 | 3.01  | 8.06   | 12.12 | 11.88  | 3.19   | 13.27 | 6.25  | 8.41              | 10.67 | 9.40  |
| Kidney    | 9.22          | 12.06        | 12.99         | 15.74        | 12.24 | 4.22  | 13.26 | 1.23  | 6.76   | 14.05 | 12.44  | 2.42   | 15.10 | 6.66  | 10.70             | 10.37 | 9.12  |
| Liver     | 8.49          | 14.83        | 9.60          | 11.68        | 12.89 | 3.83  | 11.61 | 2.88  | 4.62   | 12.97 | 9.12   | -0.24  | 11.55 | 5.75  | 7.68              | 8.27  | 6.01  |
| Liver     | 9.36          | 20.53        | 9.90          | 11.39        | 12.58 | 2.02  | 13.87 | 2.13  | 3.89   | 11.16 | 9.04   | 0.23   | 14.39 | 6.70  | 7.28              | 9.58  | 6.64  |
| Liver     | 8.40          | none         | 11.20         | 12.25        | 12.13 | 3.39  | 12.02 | 1.87  | 5.01   | 13.27 | 10.70  | 0.35   | 12.67 | 6.53  | 7.32              | 9.59  | 5.77  |
| Liver     | 9.97          | 21.13        | 12.41         | 13.30        | 13.54 | 3.10  | 12.39 | 1.89  | 5.08   | 11.61 | 11.24  | 0.79   | 15.33 | 6.07  | 6.10              | 9.35  | 6.30  |
| Liver     | 8.80          | 18.59        | 10.78         | 13.60        | 12.55 | 4.41  | 14.67 | 1.03  | 4.65   | 11.48 | 10.22  | 2.00   | 12.03 | 5.87  | 8.08              | 9.29  | 6.63  |
| Lung      | 9.22          | 13.59        | 18.20         | 13.72        | 13.00 | 3.59  | 11.97 | -1.43 | 5.66   | 9.74  | 7.86   | 0.66   | 9.60  | 3.92  | 5.61              | 6.10  | 6.58  |
| Lung      | 9.30          | 15.18        | none          | 10.88        | 10.01 | 2.69  | 13.10 | -2.22 | 2.64   | 10.28 | 6.80   | -0.48  | 10.75 | 4.16  | 5.01              | 6.98  | 7.08  |
| Lung      | 9.18          | 19.74        | 18.14         | 12.33        | 14.71 | 4.60  | 12.99 | -2.21 | 2.53   | 10.95 | 7.98   | 0.57   | 10.94 | 3.69  | 6.28              | 6.68  | 6.06  |
| Lung      | 8.80          | 13.08        | 18.53         | 11.29        | 11.28 | 2.57  | 13.01 | -1.23 | 4.96   | 9.92  | 9.48   | 1.15   | 11.71 | 4.94  | 3.67              | 9.97  | 10.84 |
| Lung      | 9.72          | none         | 15.07         | 16.57        | 12.68 | 4.32  | 11.83 | -3.49 | 2.34   | 9.49  | 8.98   | 0.29   | 10.50 | 4.40  | 4.66              | 8.43  | 8.90  |
| Spleen    | 9.29          | 18.27        | 7.03          | 17.01        | 15.73 | 7.20  | 11.98 | -0.85 | -1.10  | 6.22  | 4.32   | -2.08  | 6.75  | 3.16  | 2.58              | 4.19  | 3.29  |
| Spleen    | 8.36          | 23.74        | 5.81          | 12.23        | 10.78 | 4.47  | 10.00 | -0.92 | -1.34  | 6.37  | 4.98   | -2.86  | 7.43  | 2.90  | 4.87              | 5.84  | 3.87  |
| Spleen    | 10.40         | 21.19        | 6.74          | 14.20        | 13.37 | 6.32  | 13.00 | -0.60 | -1.03  | 7.76  | 5.49   | -2.85  | 7.91  | 3.20  | 2.11              | 4.96  | 3.95  |
| Spleen    | 9.12          | none         | 13.26         | 14.73        | none  | 4.87  | 11.18 | -0.29 | -0.29  | 6.80  | 6.44   | -2.00  | 7.70  | 3.41  | -0.40             | 5.67  | 4.23  |
| Spleen    | 10.19         | 15.33        | 15.62         | 13.19        | 12.12 | 5.49  | 11.15 | -1.79 | -0.63  | 7.70  | 6.21   | -1.94  | 8.14  | 4.18  | 0.44              | 6.20  | 6.07  |
| Tymus     | 8.13          | 24.10        | 10.03         | 13.46        | none  | 4.62  | 13.83 | 0.08  | 0.72   | 6.84  | 6.35   | -1.55  | 8.23  | 2.65  | 2.27              | 5.19  | 3.11  |
| Tymus     | 7.50          | 16.11        | 9.80          | 10.78        | 11.38 | 1.52  | 11.16 | 0.32  | 0.94   | 8.35  | 7.21   | -1.44  | 8.53  | 3.74  | 2.64              | 6.59  | 2.77  |
| Tymus     | 8.41          | 18.50        | 14.47         | 11.73        | 11.48 | 2.69  | 12.90 | 1.08  | 1.68   | 9.93  | 6.69   | -1.96  | 9.39  | 4.35  | 3.29              | 11.32 | 10.91 |
| Tymus     | 9.77          | 13.43        | 11.57         | 8.89         | 8.53  | -0.18 | 9.31  | 0.16  | 2.77   | 7.88  | 6.16   | -3.68  | 7.72  | 3.47  | -0.32             | 8.67  | 8.56  |
| Tymus     | 7.14          | 13.92        | 11.52         | 11.39        | 10.65 | 3.31  | 11.04 | -0.89 | 0.98   | 8.69  | 8.47   | -1.07  | 9.58  | 3.54  | 2.36              | 6.60  | 3.37  |

| H         | IFN- $\alpha$ | IFN- $\beta$ | IFN- $\gamma$ | IL-1 $\beta$ | IL-2  | IL-4  | IL-6  | MHC-I | MHC-II | BAFF  | CCL-19 | CCL-21 | TLR-7 | TLR-3 | $\beta$ -defensin | RIG-1 | MDA5  |
|-----------|---------------|--------------|---------------|--------------|-------|-------|-------|-------|--------|-------|--------|--------|-------|-------|-------------------|-------|-------|
| Blood     | 7.76          | 19.30        | 19.26         | 22.51        | 17.25 | 8.48  | 19.67 | -3.62 | 2.99   | 9.19  | 17.44  | 12.22  | 11.26 | 6.92  | 8.29              | 8.29  | 3.39  |
| Blood     | 8.14          | 15.63        | 16.80         | 16.15        | 13.25 | 6.75  | 15.80 | -2.62 | 2.14   | 7.43  | 14.28  | 10.29  | 9.84  | 5.22  | 7.19              | 6.05  | 2.28  |
| Blood     | 7.30          | 16.38        | 19.15         | 15.73        | 13.55 | 8.78  | 19.80 | -1.96 | 4.30   | 9.29  | 13.22  | 8.97   | 11.40 | 8.62  | 6.42              | 12.42 | 8.34  |
| Blood     | 7.27          | 16.54        | none          | 17.70        | 13.54 | 8.01  | 16.01 | -2.97 | 3.31   | 9.47  | 15.35  | 9.88   | 11.27 | 7.54  | 8.53              | 11.52 | 7.89  |
| Blood     | 5.20          | 14.64        | 18.18         | 15.13        | 12.45 | 6.89  | 15.19 | -3.05 | 2.29   | 7.47  | 13.35  | 9.04   | 10.44 | 5.20  | 6.10              | 6.30  | 3.36  |
| Fabricius | 13.60         | 22.04        | 16.15         | 15.80        | 12.50 | 5.36  | 15.67 | 1.23  | 2.29   | 12.37 | 8.98   | 0.54   | 11.11 | 5.03  | 14.65             | 8.49  | 8.31  |
| Fabricius | 11.94         | 14.53        | 14.13         | 12.90        | 9.89  | 2.94  | 12.13 | 0.80  | 1.44   | 10.44 | 10.39  | 2.46   | 7.82  | 6.00  | 11.71             | 8.76  | 6.58  |
| Fabricius | 7.91          | 23.35        | 15.18         | 13.99        | 14.57 | 4.61  | 12.16 | 1.31  | 2.36   | 10.81 | 11.27  | 1.12   | 8.52  | 6.80  | 10.43             | 9.06  | 7.84  |
| Fabricius | 7.30          | 22.33        | 12.30         | 13.66        | 13.10 | 3.44  | 13.68 | 0.72  | 3.33   | 10.13 | 10.81  | 1.53   | 6.59  | 6.05  | 9.79              | 8.71  | 5.83  |
| Fabricius | 10.19         | 22.06        | 11.70         | 15.36        | 8.40  | 2.28  | 10.08 | -1.36 | 2.03   | 9.62  | 6.00   | -2.12  | 9.44  | 2.75  | 7.65              | 6.98  | 8.49  |
| Hardrain  | 15.09         | 24.46        | 16.11         | 21.10        | 13.20 | 5.67  | 6.70  | -0.30 | 3.80   | 11.90 | 8.25   | 2.01   | 12.03 | 3.15  | 12.94             | 4.08  | 4.41  |
| Hardrain  | 14.47         | 13.93        | none          | 12.38        | 10.55 | 2.47  | 6.12  | 2.22  | 4.79   | 11.64 | 8.96   | 1.44   | 10.59 | 4.72  | 7.46              | 5.56  | 8.35  |
| Hardrain  | 14.45         | 22.78        | 15.66         | 18.51        | 17.45 | 5.50  | 5.64  | 1.86  | 5.00   | 10.01 | 10.28  | 2.68   | 11.11 | 3.35  | 9.92              | 4.63  | 6.33  |
| Hardrain  | 14.04         | 22.51        | 16.07         | 18.69        | 13.26 | 6.76  | 6.92  | 2.12  | 6.08   | 11.54 | 10.66  | 5.59   | 12.41 | 4.58  | 10.88             | 4.73  | 6.19  |
| Hardrain  | 7.27          | none         | 13.38         | 9.78         | 13.82 | -0.92 | 4.48  | -0.04 | 6.91   | 11.01 | 8.75   | -1.02  | 9.46  | 2.29  | 6.21              | 5.74  | 4.63  |
| Kidney    | 12.00         | 15.76        | 14.72         | 21.87        | 12.17 | 4.27  | 15.32 | 1.38  | 4.94   | 14.03 | 11.85  | 2.36   | 15.14 | 5.11  | 13.85             | 9.83  | 7.30  |
| Kidney    | 13.38         | 19.00        | 14.38         | 14.86        | 10.25 | 4.52  | 14.67 | 2.75  | 6.96   | 15.53 | 11.90  | 3.25   | 14.47 | 5.50  | 10.67             | 10.95 | 8.99  |
| Kidney    | 9.89          | 18.36        | 22.23         | 21.16        | 15.43 | 6.22  | 18.18 | 3.32  | 7.07   | 14.75 | 12.62  | 4.48   | 15.88 | 7.72  | 10.37             | 11.22 | 9.56  |
| Kidney    | 8.08          | 24.23        | 14.06         | 14.29        | 12.17 | 4.53  | 12.60 | 2.54  | 6.75   | 12.50 | 10.26  | 1.94   | 13.07 | 4.24  | 6.36              | 10.48 | 7.97  |
| Kidney    | 9.93          | 21.65        | none          | 13.53        | 12.52 | 3.82  | 16.67 | 3.19  | 8.49   | 13.88 | 11.95  | 2.92   | 14.01 | 5.84  | 8.26              | 14.13 | 13.41 |
| Liver     | 9.00          | 23.38        | 11.00         | 13.28        | 12.89 | 4.28  | 13.45 | 1.74  | 4.36   | 10.69 | 9.26   | 0.33   | 11.33 | 5.97  | 9.61              | 8.34  | 6.98  |
| Liver     | 13.16         | 12.97        | 9.50          | 20.66        | 10.13 | 1.62  | 12.11 | 1.37  | 3.66   | 14.11 | 10.72  | 0.48   | 11.28 | 5.41  | 6.30              | 9.77  | 6.86  |
| Liver     | 10.55         | 26.04        | 12.09         | 15.30        | 20.41 | 6.01  | 19.02 | 4.21  | 6.03   | 12.12 | 13.32  | 3.18   | 13.45 | 8.09  | 8.62              | 9.87  | 7.90  |
| Liver     | 8.26          | 15.70        | 12.16         | 16.36        | 12.29 | 4.29  | 15.23 | 2.43  | 4.66   | 10.84 | 10.25  | 1.06   | 11.89 | 5.96  | 7.87              | 8.61  | 6.77  |
| Liver     | 9.43          | 24.66        | 9.49          | 13.46        | 13.86 | 4.02  | 12.50 | 1.84  | 4.51   | 13.45 | 10.57  | 0.47   | 13.44 | 6.69  | 8.03              | 9.10  | 6.63  |
| Lung      | 8.87          | 17.28        | 11.87         | 10.56        | none  | 3.54  | 9.81  | -3.14 | 2.40   | 9.09  | 7.09   | -0.47  | 10.69 | 4.76  | 6.64              | 8.89  | 8.32  |
| Lung      | 13.11         | 22.70        | 13.47         | 18.20        | 12.16 | 3.43  | 10.85 | -2.06 | 2.56   | 9.68  | 8.51   | -0.38  | 10.45 | 3.64  | 5.79              | 8.20  | 8.68  |
| Lung      | 9.94          | 18.05        | 14.85         | 17.23        | 14.32 | 4.89  | 11.77 | -2.11 | 2.53   | 10.44 | 7.23   | -0.26  | 10.29 | 4.99  | 3.80              | 10.79 | 11.34 |
| Lung      | 10.96         | 14.21        | 13.36         | 18.29        | 23.09 | 4.00  | 10.32 | -1.39 | 3.51   | 9.35  | 7.64   | -0.36  | 9.53  | 3.87  | 6.65              | 8.48  | 10.66 |
| Lung      | 7.88          | 16.20        | 20.74         | 13.53        | 12.52 | 3.12  | 12.17 | -3.67 | 3.06   | 9.16  | 7.51   | -0.52  | 9.81  | 3.65  | 5.34              | 6.78  | 6.27  |
| Spleen    | 9.05          | 23.09        | 15.41         | 11.58        | 12.46 | 4.01  | 9.79  | -2.43 | -1.83  | 6.96  | 5.21   | -3.07  | 7.12  | 2.17  | 6.59              | 6.23  | 5.63  |
| Spleen    | 11.90         | 23.00        | 11.06         | 14.18        | 13.02 | 5.01  | 11.92 | -0.56 | -0.36  | 7.80  | 5.04   | -2.15  | 7.23  | 2.92  | 0.75              | 6.37  | 5.15  |
| Spleen    | 9.46          | 19.66        | 10.21         | 13.85        | 19.74 | 6.87  | 11.81 | -0.51 | -0.24  | 8.73  | 7.00   | -0.89  | 7.83  | 4.02  | 0.35              | 6.38  | 5.54  |
| Spleen    | 9.63          | 15.99        | 14.21         | 18.50        | 13.88 | 5.71  | 11.38 | -1.42 | -0.64  | 7.16  | 5.59   | -1.90  | 7.14  | 2.51  | 2.04              | 6.18  | 5.75  |
| Spleen    | 6.26          | 22.18        | 10.53         | 11.20        | 10.27 | 2.07  | 8.93  | -2.87 | -1.88  | 6.27  | 4.92   | -3.85  | 5.45  | 1.53  | 2.51              | 4.77  | 3.07  |
| Tymus     | 14.97         | 19.71        | 12.93         | 24.12        | 12.30 | 2.70  | 15.14 | -1.00 | 0.45   | 9.25  | 6.50   | -2.98  | 9.07  | 4.30  | 3.83              | 9.39  | 9.51  |
| Tymus     | 9.73          | 19.65        | 13.46         | 11.02        | 9.25  | -0.33 | 9.92  | -0.60 | 1.92   | 8.60  | 7.25   | -1.26  | 8.10  | 3.08  | 2.63              | 7.08  | 3.97  |
| Tymus     | 7.28          | 17.82        | 12.22         | 16.50        | 16.84 | 3.26  | 12.13 | -0.35 | 2.45   | 9.49  | 8.66   | -0.40  | 8.79  | 4.58  | 3.86              | 8.70  | 4.97  |
| Tymus     | 9.55          | none         | 22.75         | 13.13        | 12.07 | 3.81  | 14.00 | -0.17 | 2.24   | 9.12  | 7.42   | -1.03  | 9.50  | 4.45  | 2.08              | 7.55  | 5.64  |
| Tymus     | 8.93          | 19.25        | none          | 12.37        | 10.70 | 2.97  | 12.91 | -0.41 | 1.39   | 8.99  | 8.18   | -0.92  | 8.57  | 3.93  | 4.07              | 9.38  | 9.25  |
